# Supplementary material for: Fermentative Production of the Diamine Putrescine: System Metabolic Engineering of Corynebacterium Glutamicum
Source: PubMed Central journal article supplement (PMC4495370; doi:10.3390/metabo5020211), 2015-04-24
Supplement: metabolites-05-00211-s001.pdf [file metabolites-05-00211-s001.pdf]

## Supplementary Information

**Table S1.** Production Yield  $Y_{P/S}$  and Biomass Flux from Different Putrescine Producing *C. Glutamicum* Strains.

| Strain   | $Y_{P/S}$ (mol·mol <sup>-1</sup> ) | Biomass flux (h·h <sup>-1</sup> ) | Ref.       |
|----------|------------------------------------|-----------------------------------|------------|
| PUT3,9,6 | 0.00                               | 0.99                              | [1]        |
| PUT12    | 0.04                               | 0.96                              | [1]        |
| PUT18    | 0.12                               | 0.84                              | [1]        |
| PUT15    | 0.20                               | 0.77                              | [1]        |
| PUT21    | 0.33                               | 0.46                              | [1]        |
| PUT27    | 0.43                               | 0.35                              | [1]        |
| PUT24    | 0.53                               | 0.25                              | [1]        |
| NA2      | 0.35                               | 0.50                              | This study |
| NA3      | 0.37                               | 0.45                              | This study |
| NA4      | 0.37                               | 0.46                              | This study |
| NA5      | 0.43                               | 0.54                              | This study |
| NA6      | 0.53                               | 0.49                              | This study |
| NA7      | 0.49                               | 0.51                              | This study |
| NA8      | 0.47                               | 0.53                              | This study |

**Table S2.** Changes Made to the Stoichiometric Model of *Corynebacterium Glutamicum* [2].

| Reaction Stoichiometry                                                                                    |
|-----------------------------------------------------------------------------------------------------------|
| <sup>1</sup> [c]CPD-217 $\rightleftharpoons$ 24DINH2-PENTANOATE                                           |
| <sup>1</sup> [c]CPD-299 + CO-A $\rightleftharpoons$ D-ALANINE + ACETYL-COA                                |
| <sup>1</sup> [c]D-PROLINE + NADH + PROTON $\rightleftharpoons$ 5-AMINOPENTANOATE + NAD                    |
| <sup>1</sup> [c]L-ORNITHINE + 2-KETOGLUTARATE $\rightleftharpoons$ GLT + L-GLUTAMATE-GAMMA-SEMIALDEHYDE   |
| <sup>1</sup> [c]L-ORNITHINE $\rightleftharpoons$ CPD-217                                                  |
| <sup>1</sup> [c]NADP + WATER + 24DINH2-PENTANOATE $\rightleftharpoons$ AMMONIA + NADPH + CPD-299 + PROTON |
| <sup>1</sup> [c]PRO $\rightleftharpoons$ D-PROLINE                                                        |
| [c]ACETYL-P + ADP $\rightleftharpoons$ ACET + ATP + PROTON                                                |
| [c]GLYCEROL-3P + NAD $\rightarrow$ DIHYDROXY-ACETONE-PHOSPHATE + NADH                                     |
| L-LACTATE[c] $\rightleftharpoons$ L-LACTATE[e]                                                            |
| PUTRESCINE[e] $\rightleftharpoons$ PUTRESCINE[c]                                                          |
| L-ORNITHINE[e] $\rightleftharpoons$ L-ORNITHINE[c]                                                        |
| GLYCEROL[e] $\rightleftharpoons$ GLYCEROL[c]                                                              |
| L-ARABINOSE[e] $\rightleftharpoons$ L-ARABINOSE[c]                                                        |
| [c]L-ARABINOSE $\rightleftharpoons$ L-RIBULOSE                                                            |
| [c]L-RIBULOSE + ATP $\rightarrow$ RIBULOSE-5P + ADP                                                       |
| [c]RIBULOSE-5P $\rightleftharpoons$ XYLULOSE-5-PHOSPHATE                                                  |
| D-XYLOSE[e] $\rightleftharpoons$ D-XYLOSE[c]                                                              |
| [c]D-XYLOSE $\rightleftharpoons$ XYLULOSE                                                                 |
| [c]XYLULOSE + ATP $\rightarrow$ XYLULOSE-5-PHOSPHATE + ADP                                                |

<sup>1</sup> Reactions were constrained to zero. Abbreviations: 24DINH2-PENTANOATE: 2,4-diaminopentanoate; ACET: acetate; ACETYL-P: acetylphosphate; [c]: cytoplasmic; CPD-217: D-ornithine; CPD-299: 2-amino-4-oxopentanoate; [e]: extracellular; GLT: L-glutamate; PRO: L-proline.

## References

1. Schneider, J.; Eberhardt, D.; Wendisch, V.F. Improving putrescine production by *Corynebacterium glutamicum* by fine-tuning ornithine transcarbamoylase activity using a plasmid addiction system. *Appl. Microbiol. Biotechnol.* **2012**, *95*, 169–178, doi:10.1007/s00253-012-3956-9.
2. Shinfuku, Y.; Sorpitiporn, N.; Sono, M.; Furusawa, C.; Hirasawa, T.; Shimizu, H. Development and experimental verification of a genome-scale metabolic model for *Corynebacterium glutamicum*. *Microb. Cell Fact* **2009**, *8*, 43, doi:10.1186/1475-2859-8-43.

© 2015 by the authors; licensee MDPI, Basel, Switzerland. This article is an open access article distributed under the terms and conditions of the Creative Commons Attribution license (<http://creativecommons.org/licenses/by/4.0/>).
